# Supplementary material for: Genetic mechanisms underlying yield potential in the rice high-yielding cultivar Takanari, based on reciprocal chromosome segment substitution lines
Source: PubMed Central journal article supplement (PMC4243286; doi:10.1186/s12870-014-0295-2), 2014-11-18

**(A)**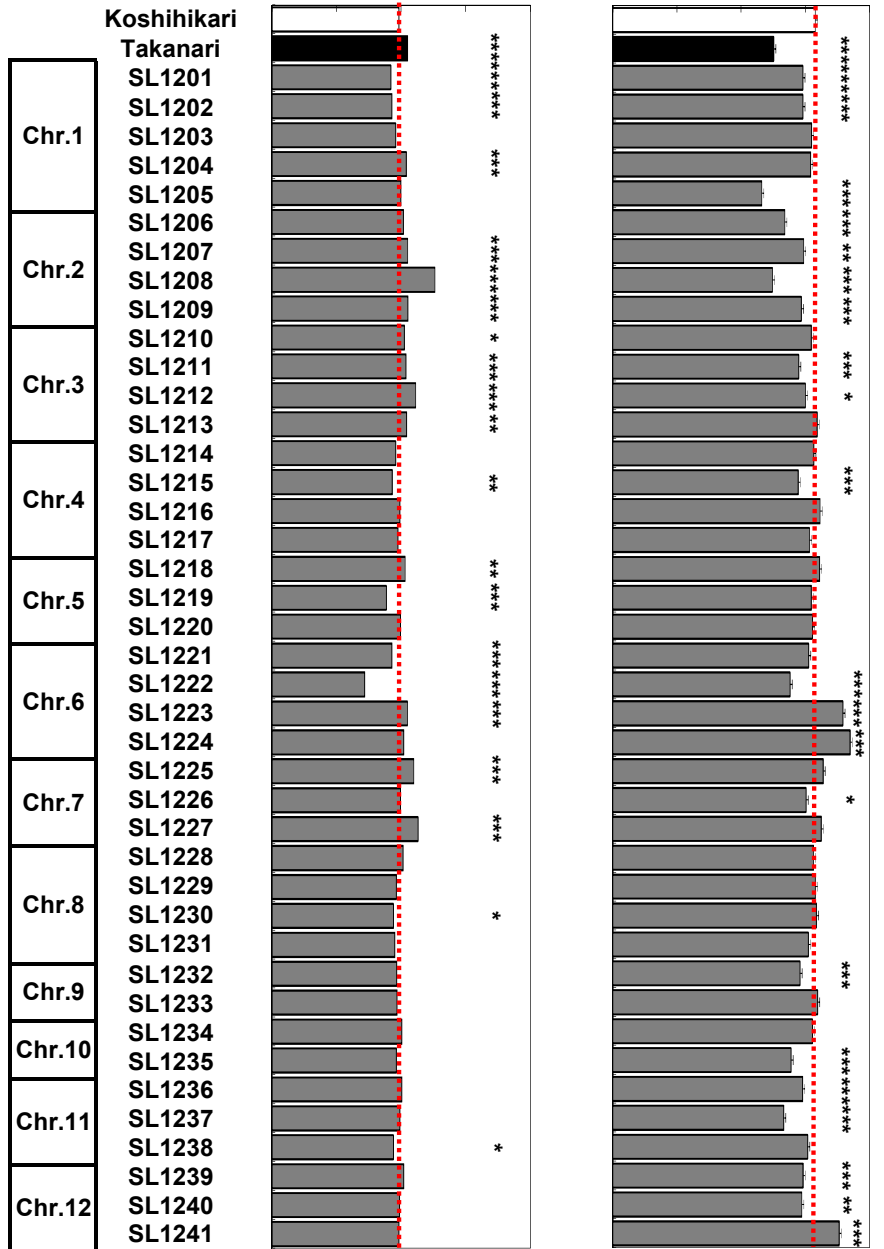**(B)**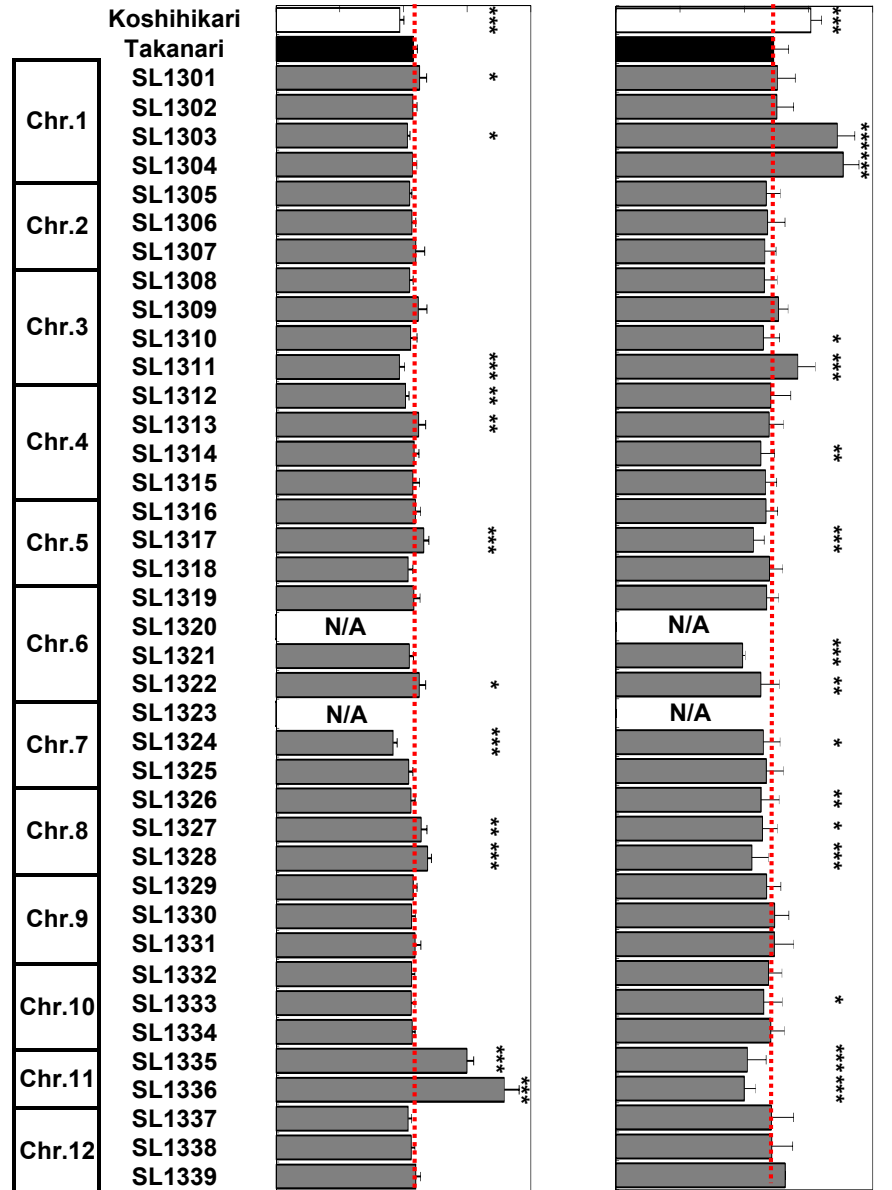

Supplement: 12870_2014_295_MOESM2_ESM.pdf [file 12870_2014_295_MOESM2_ESM.pdf]
