# Supplementary material for: Genetic mechanisms underlying yield potential in the rice high-yielding cultivar Takanari, based on reciprocal chromosome segment substitution lines
Source: PubMed Central journal article supplement (PMC4243286; doi:10.1186/s12870-014-0295-2), 2014-11-18

**GN1a**

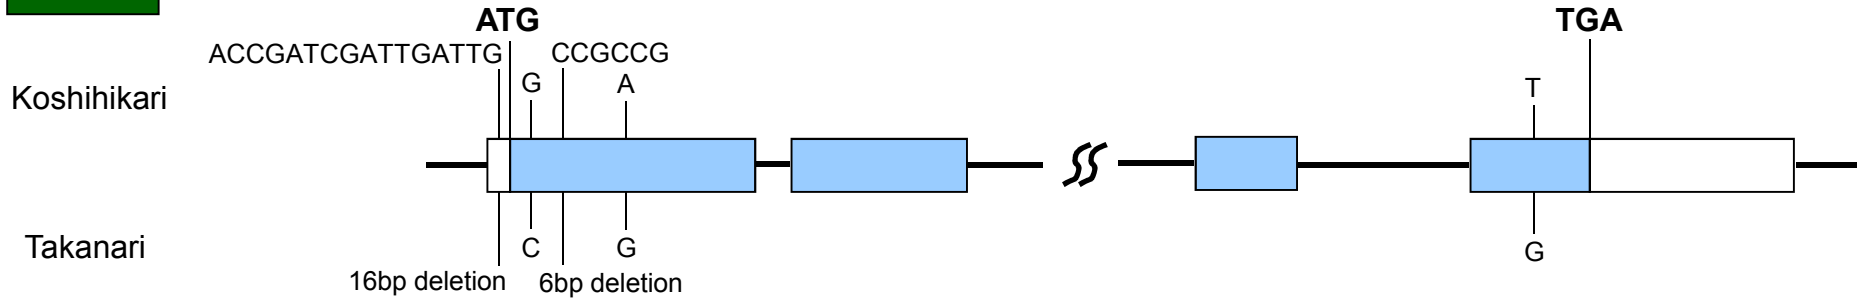

**APO1**

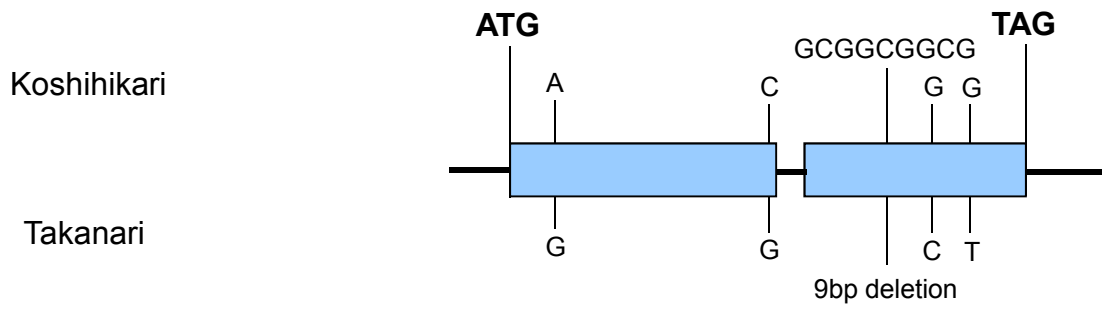

**sd1**

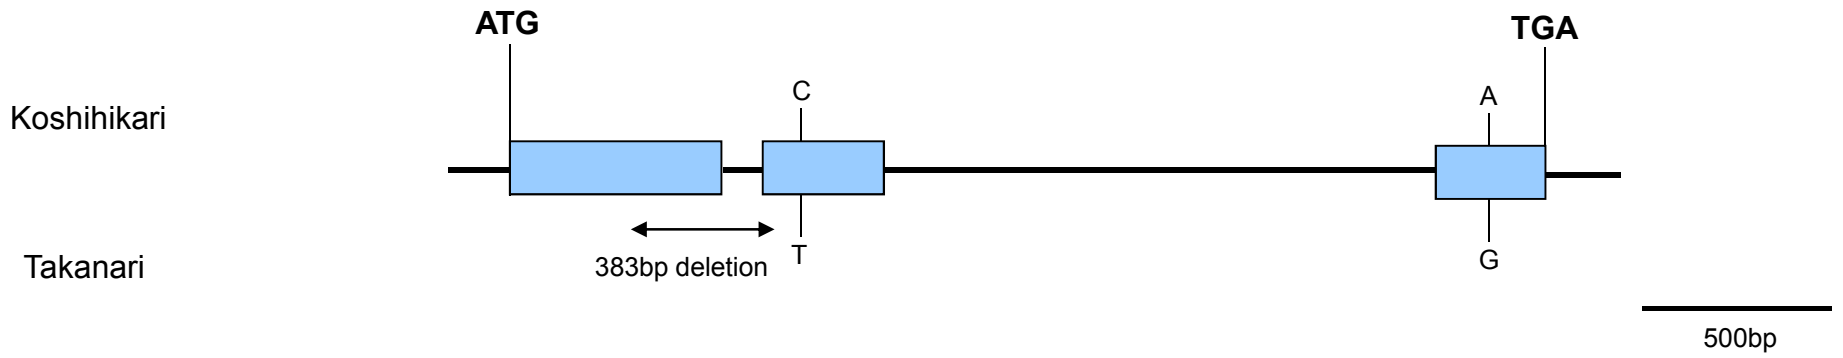

Supplement: 12870_2014_295_MOESM3_ESM.pdf [file 12870_2014_295_MOESM3_ESM.pdf]
